# Supplementary material for: Transient exposure to elevated glucose levels causes persistent changes in dermal microvascular endothelial cell responses to injury
Source: PubMed Central journal article supplement — Ann Transl Med. 2021 May;9(9):758. doi: 10.21037/atm-20-7617 (PMC8246238; doi:10.21037/atm-20-7617), 2021-05
Supplement: atm-09-09-758-supplementary.pdf [file atm-09-09-758-supplementary.pdf]

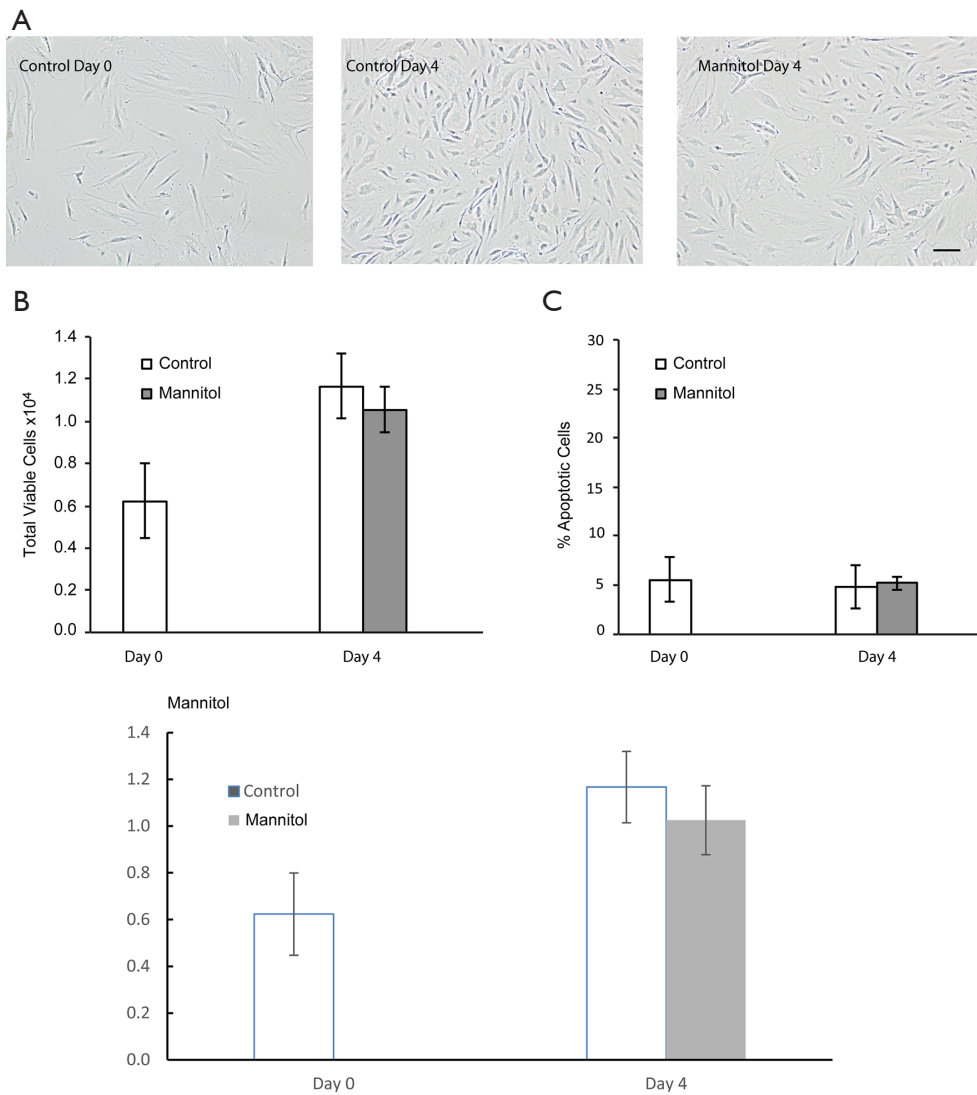

**Figure S1** Mannitol exposure showed no effects on morphology changes and cell viability of dermal microvascular endothelial cell. (A) Both cells treated in mannitol transient on day 4 shows spindle shape and appear in oval shape. The magnification bar equals 50  $\mu\text{m}$ . (B) Effects of mannitol on proliferation profile in dermal microvascular endothelial cell culture over time. (C) Effect of mannitol on apoptosis of dermal microvascular endothelial cell over time.

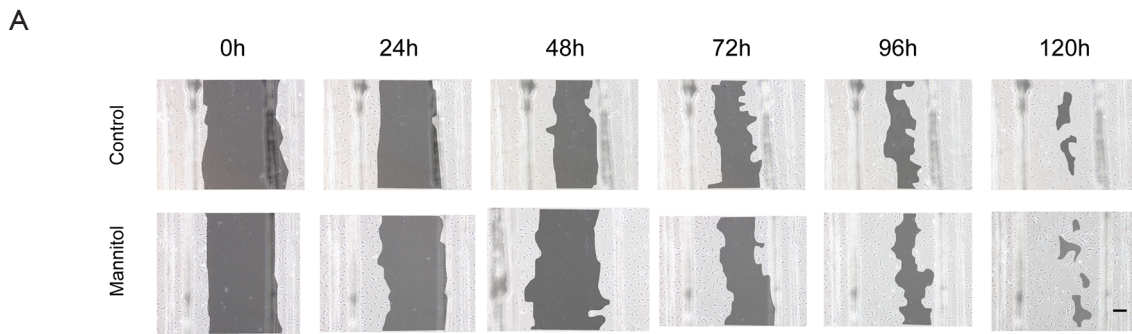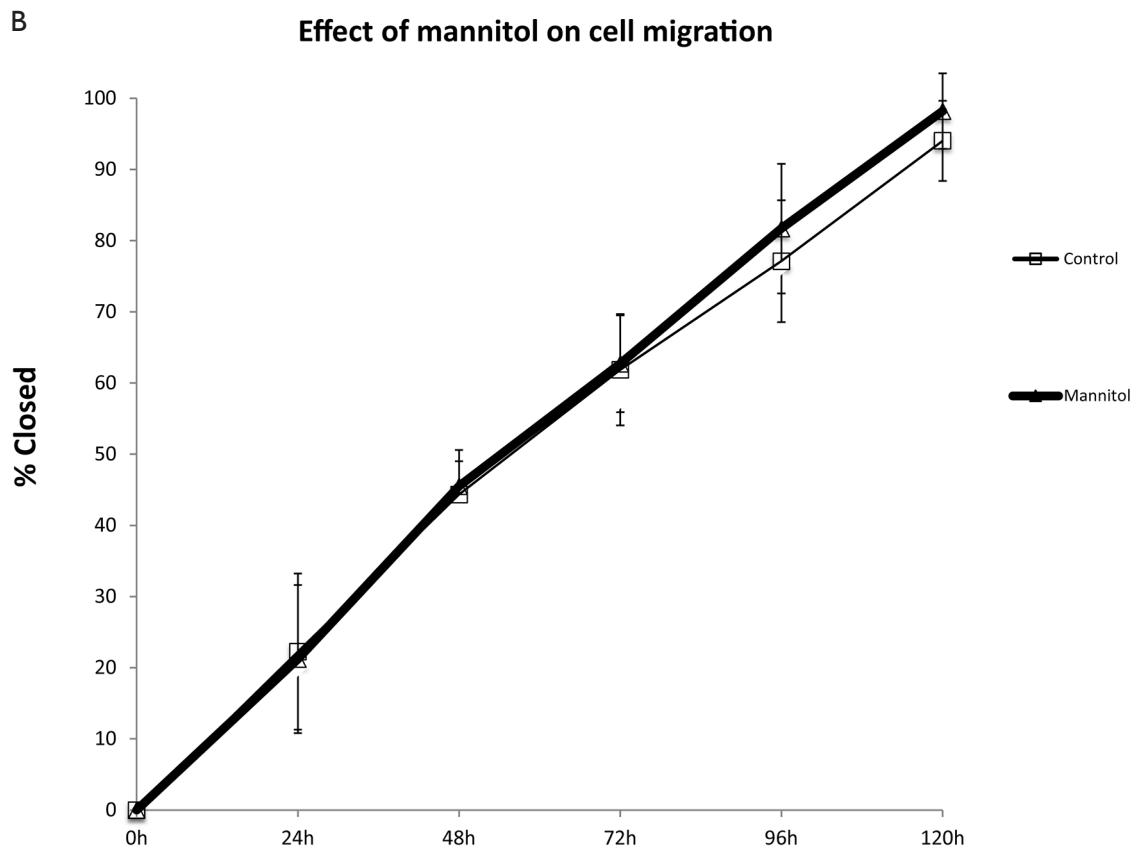

**Figure S2** There are no significant difference between control and Mannitol group of dermal microvascular endothelial cells in a wound “scratch” assay. (A) Dermal microvascular endothelial cells were treated in M131 with or without elevated glucose and fatty acid for 2 days, and then scratched. The scratched cells were culture in conditional medium as follows: control Group, continuous M131 without elevated glucose; Mannitol Group, continuous M131 with elevated 30 mM mannitol. Images were captured immediately post scratch 0, 24, 48, 72, 96 and 120 h. (B) Data displayed indicate mean  $\pm$  SD of a single representative experiment with N=6 for individual condition. And the value of magnification bar is 200  $\mu$ m.

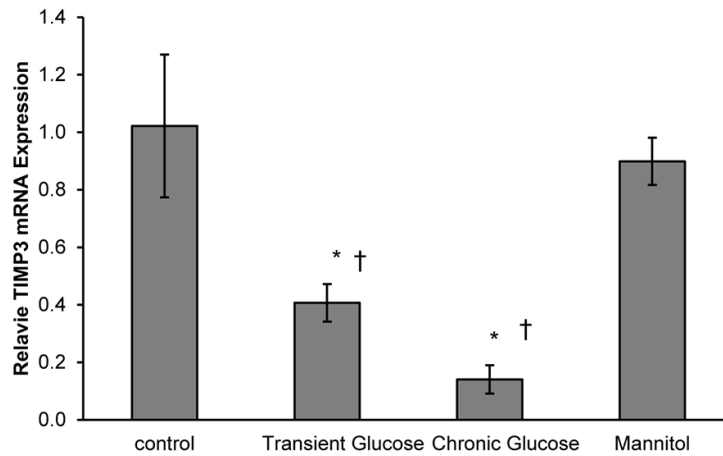

**Figure S3** Transient elevated Glucose exposure induces a persistent change on Timp3 gene expression by dermal microvascular endothelial cell. Timp3 mRNA measured by RTPCR shows down-regulated in both transient Glucose group and Chronic group (\*P<0.05 compared with control group on day 4). There is no significant difference between control group on day 0 and day 4. Mannitol as a Control treatment to control for osmolarity did not affect TIMP3 gene expression significantly. The Data displayed indicated mean ± SD of a single representative experiment with N=6 for individual condition.
